# Supplementary material
Source: Springer Nature journal article supplement (https://www.springermedizin.de/resource/supplementary/12913_2008_896_MOESM2_ESM.pdf/9536398)

### Tonsillectomies

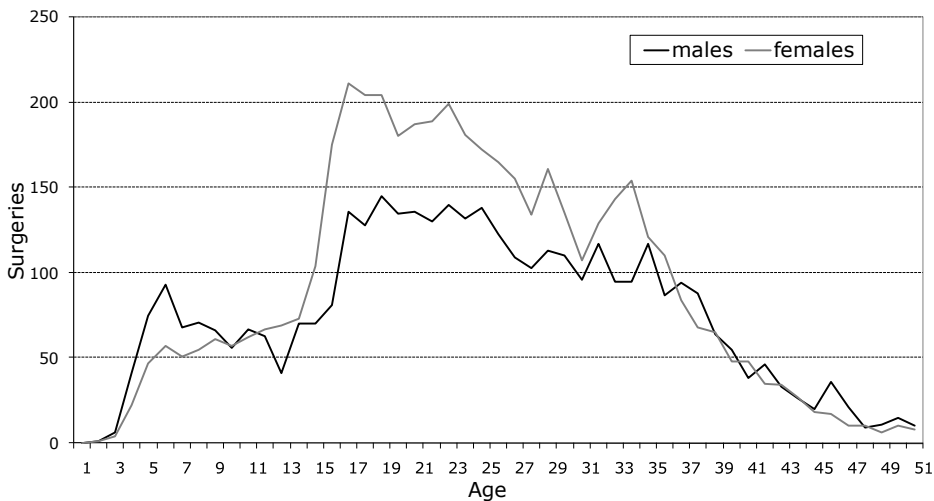

### Adenotonsillectomies

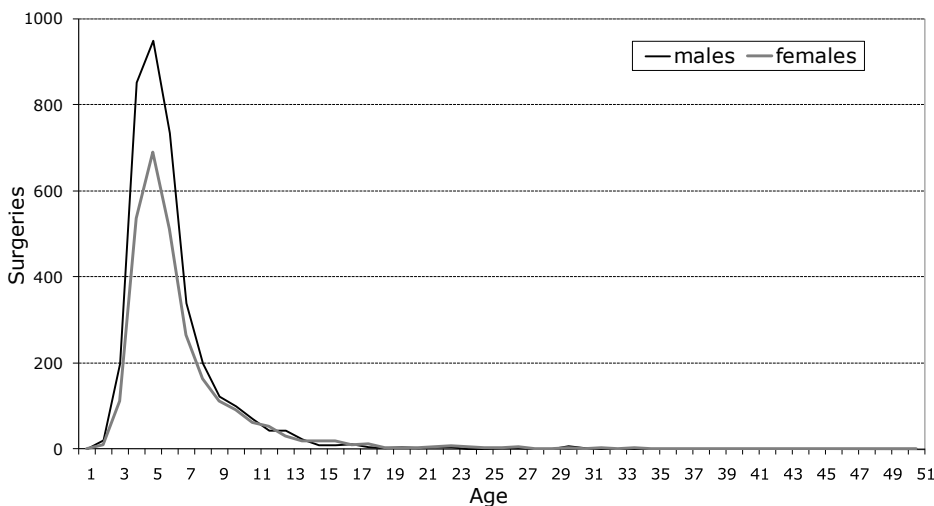

### Adenoidectomies

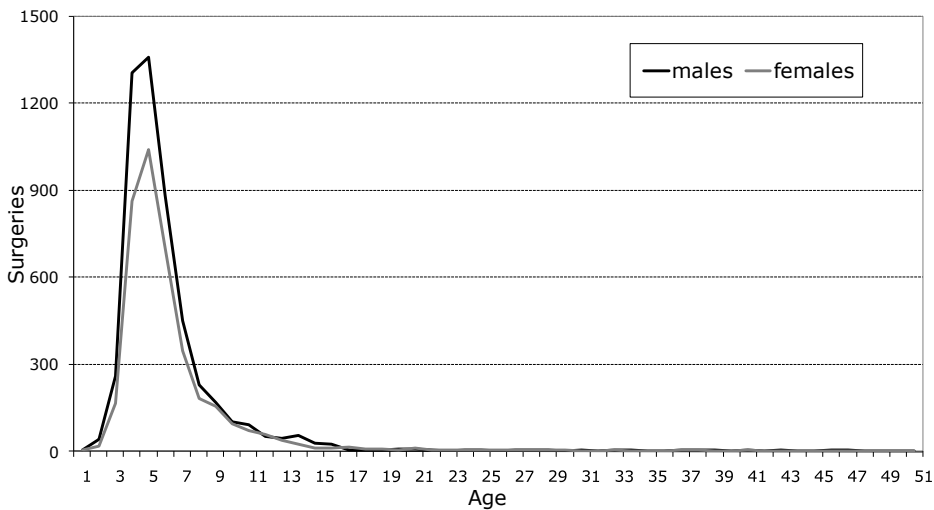

Supplement: MOESM2 [file 9536398]
